# Supplementary material for: Photocatalytic hydrogen evolution over cyanine-sensitized Ag/TiO2
Source: Royal Society of Chemistry journal article supplement (doi:10.1039/d2ra00788f), 2022-01-01
Supplement: d2ra00788f1.pdf [file d2ra00788f1.pdf]

# Photocatalytic Hydrogen Evolution Over Cyanine Sensitized Ag/ TiO<sub>2</sub>

Layla Almazroai <sup>a</sup>, Rasha E. El-Mekawy <sup>a,b</sup>, Rihab Musa <sup>c</sup>, Lina Ali <sup>c</sup>

*a* Department of Chemistry, Faculty of Applied Science, Umm Al-Qura University, Makkah, Saudi Arabia. E-mail: [ismazroai@uqu.edu.sa](mailto:ismazroai@uqu.edu.sa)

*b* Department of Petrochemicals, Egyptian Petroleum Research Institute, Nasr City, Cairo, Egypt

*c* undergraduate students

\*Corresponding author

E-mail: [ismazroai@uqu.edu.sa](mailto:ismazroai@uqu.edu.sa)



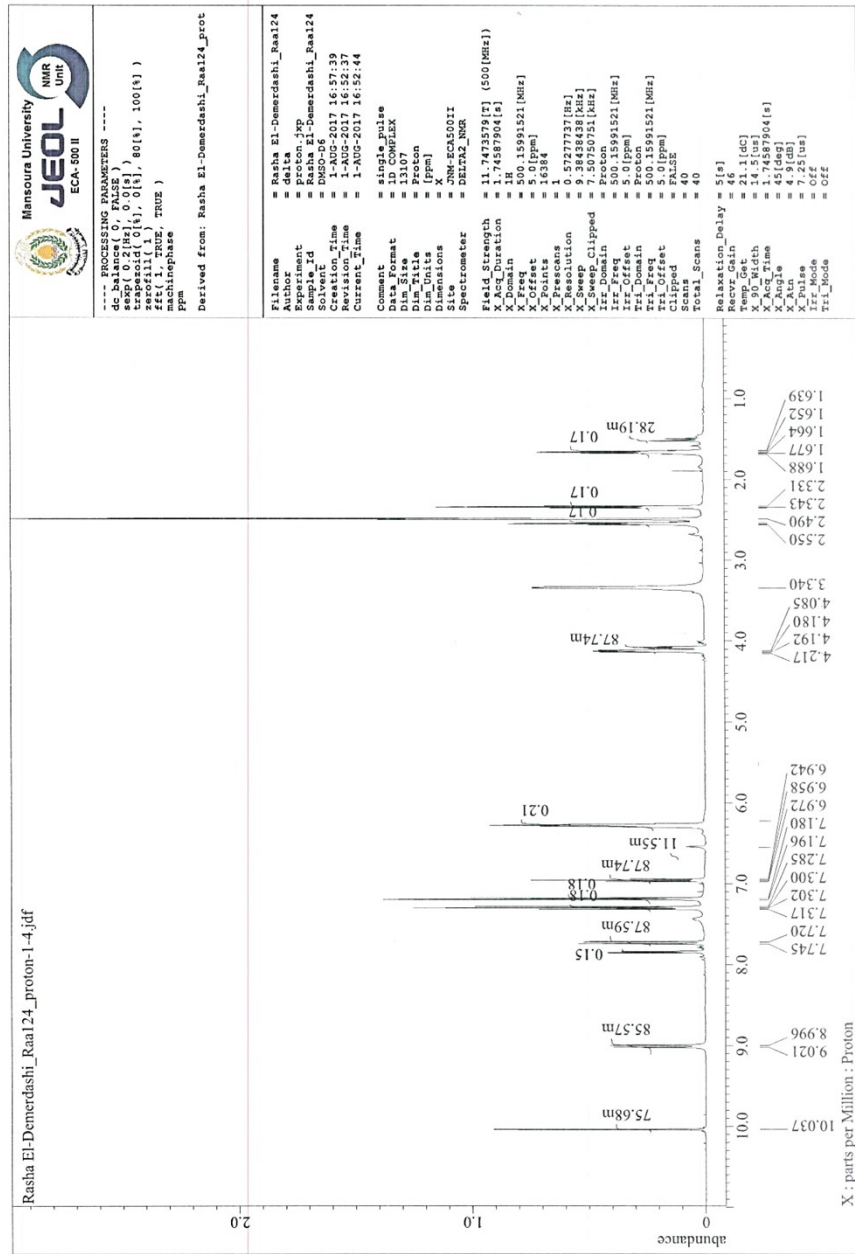

Figure S1(b):  $^1\text{H}$  NMR of compound 4 (C1)

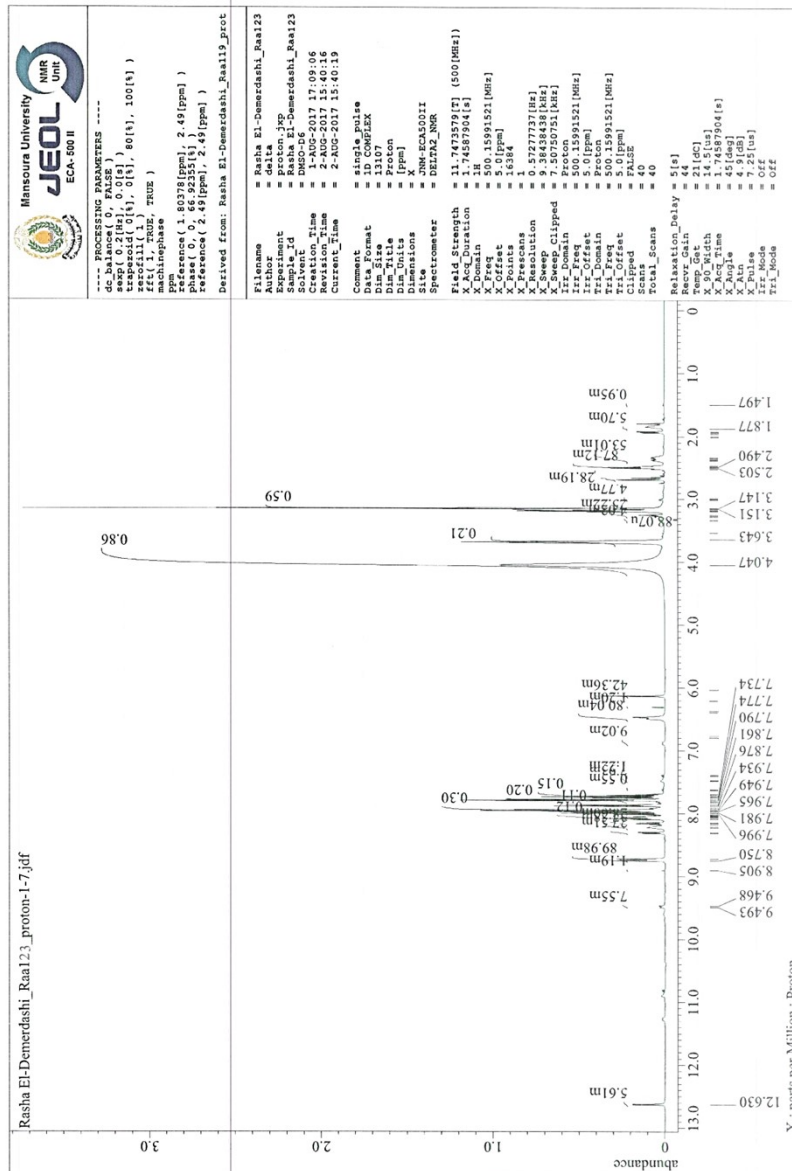

Figure S1(c): <sup>1</sup>H NMR of compound 5 (C2)

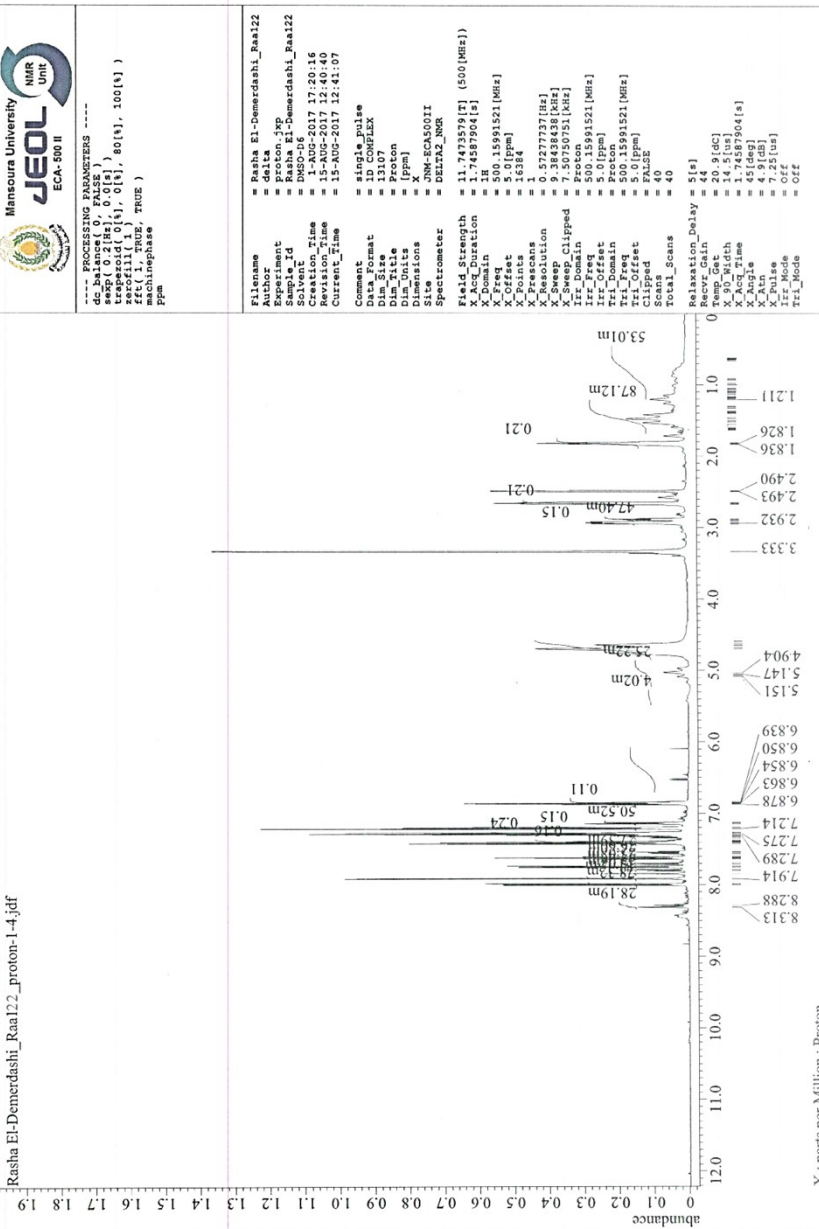

Figure S1(d):<sup>1</sup> H NMR of compound 6 (C4)

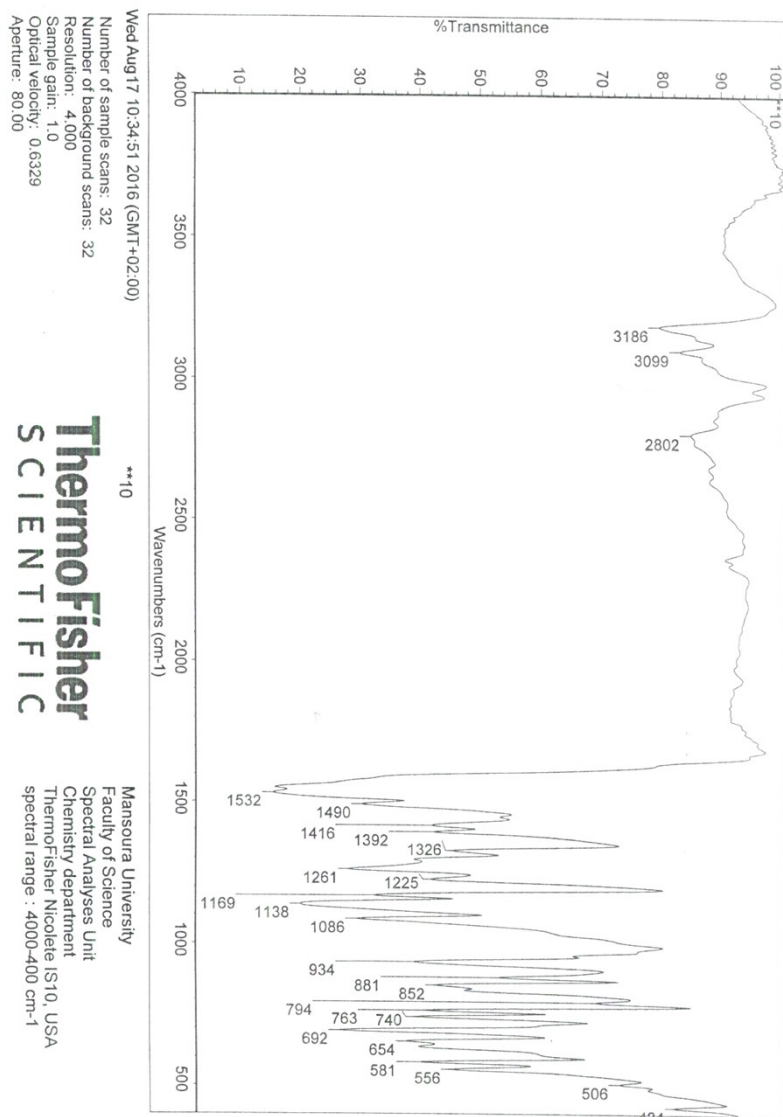

Figure S1(e):IR spectrum of compound 3 (C3)

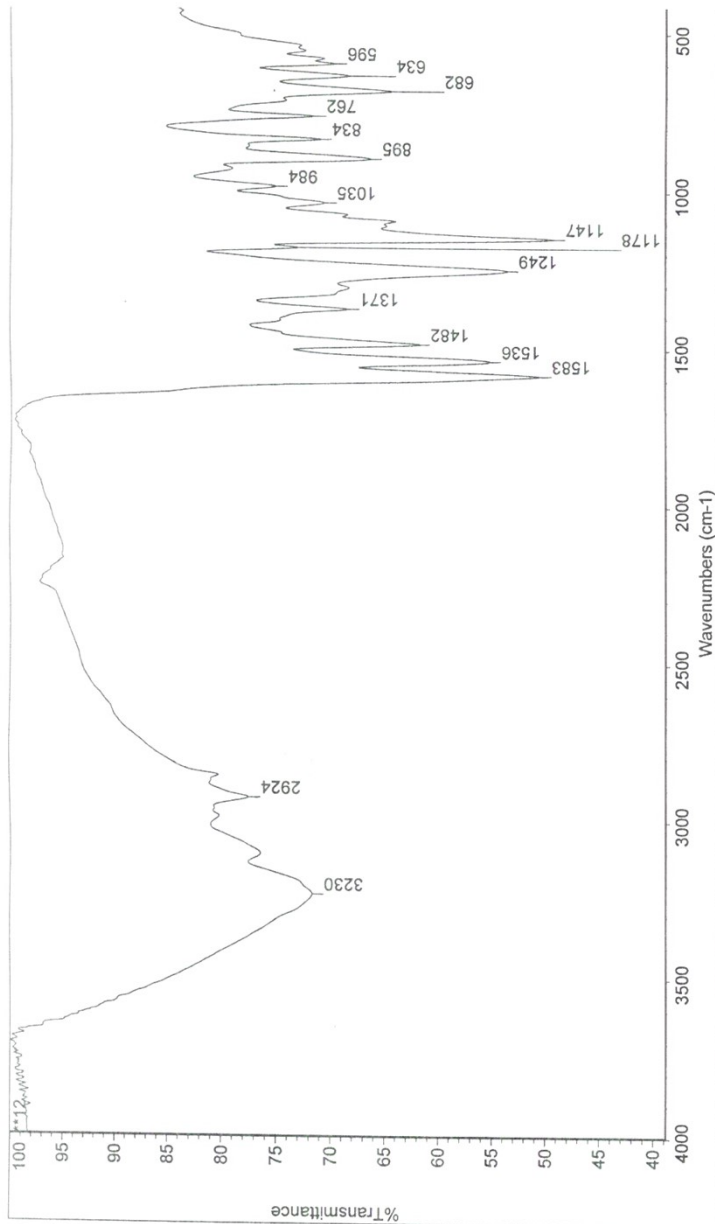

**Figure S1(f):IR spectrum of compound 6 (C4)**

Wed Aug 17 13:16:52 2016 (GMT+02:00)

\*\*\*12

Number of sample scans: 32  
 Number of background scans: 32  
 Resolution: 4.000  
 Sample gain: 1.0  
 Optical velocity: 0.6329  
 Aperture: 80.00

Mansoura University  
 Faculty of Science  
 Spectral Analyses Unit  
 Chemistry department  
 ThermoFisher Nicolette IS10, USA  
 spectral range : 4000-400 cm<sup>-1</sup>

**ThermoFisher**  
 SCIENTIFIC

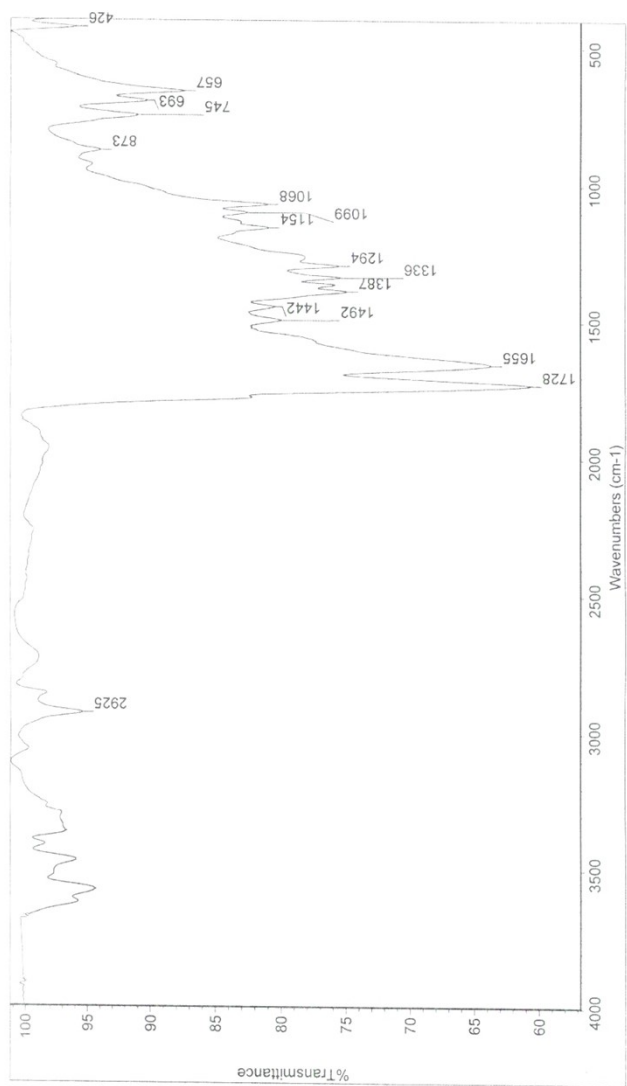

Sat Sep 10 13:22:05 2016 (GMT+02:00)

Number of sample scans: 32  
Number of background scans: 32  
Resolution: 4.000  
Sample gain: 1.0  
Optical velocity: 0.6329  
Aperture: 80.00

Mansoura University  
Faculty of Science  
Spectral Analyses Unit  
Chemistry department  
ThermoFisher Nicolet IS10, USA  
spectral range : 4000-400 cm<sup>-1</sup>

**ThermoFisher**  
SCIENTIFIC

**Figure S1(g):IR spectrum of compound 4 (C1)**



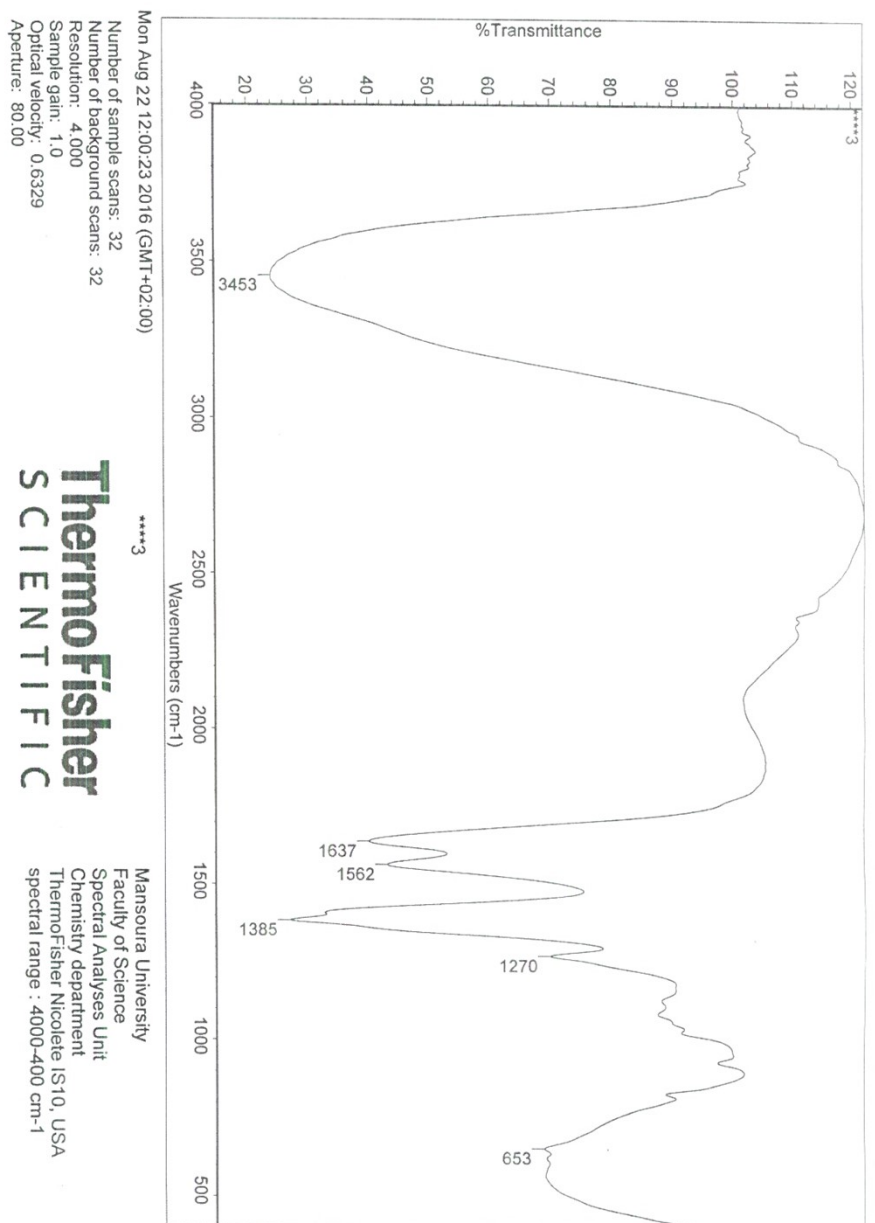

**Figure S1(h):IR spectrum of compound 5 (C2)**

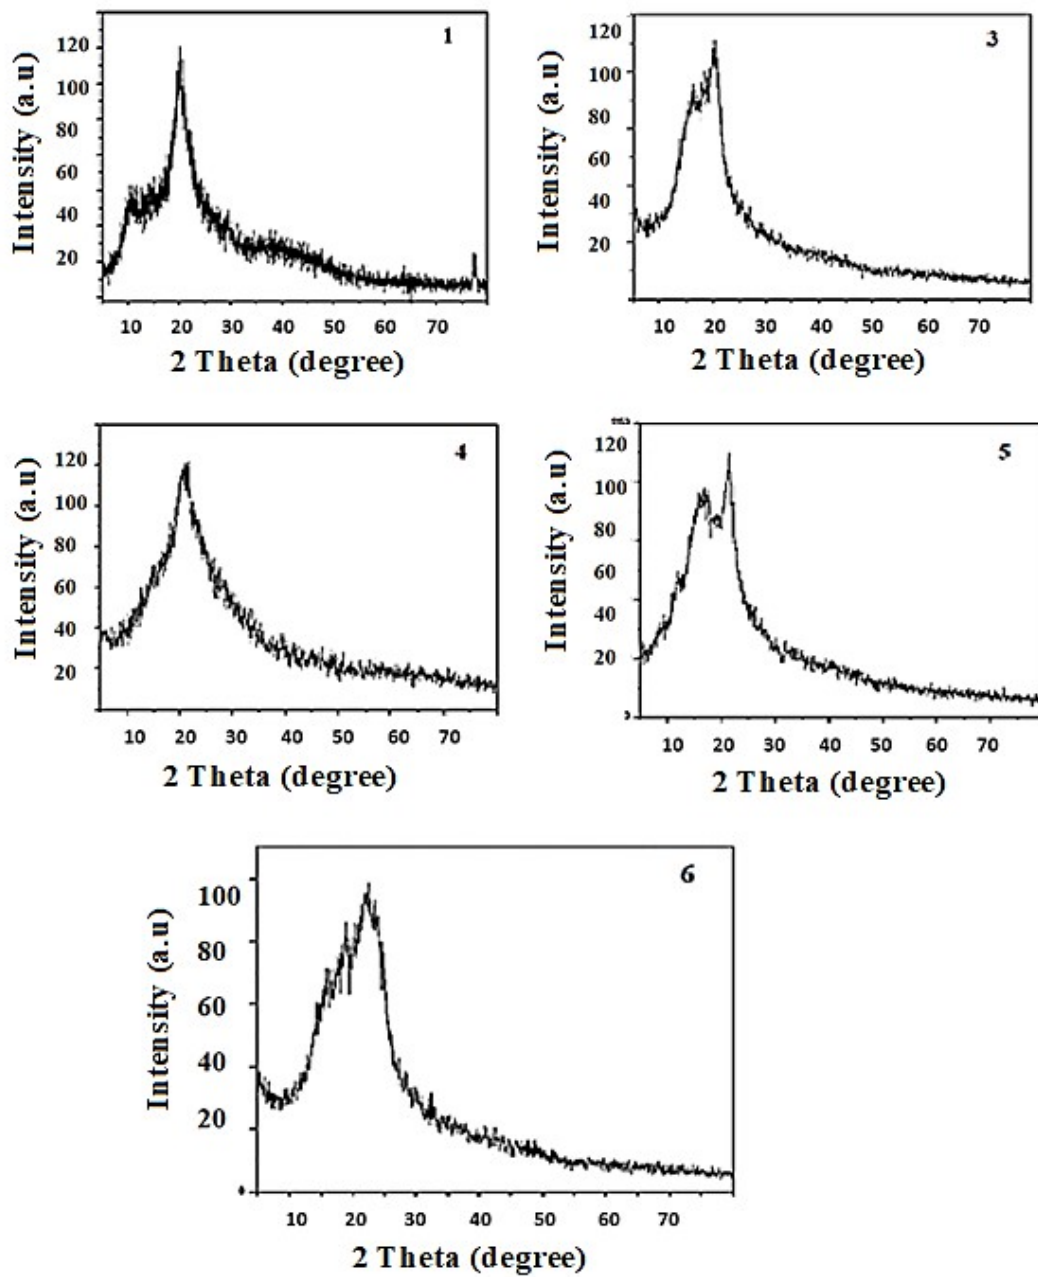

Figure S2: Crystallinity model of polymethinecyanine dye 1, 3, 4, 5 and 6.

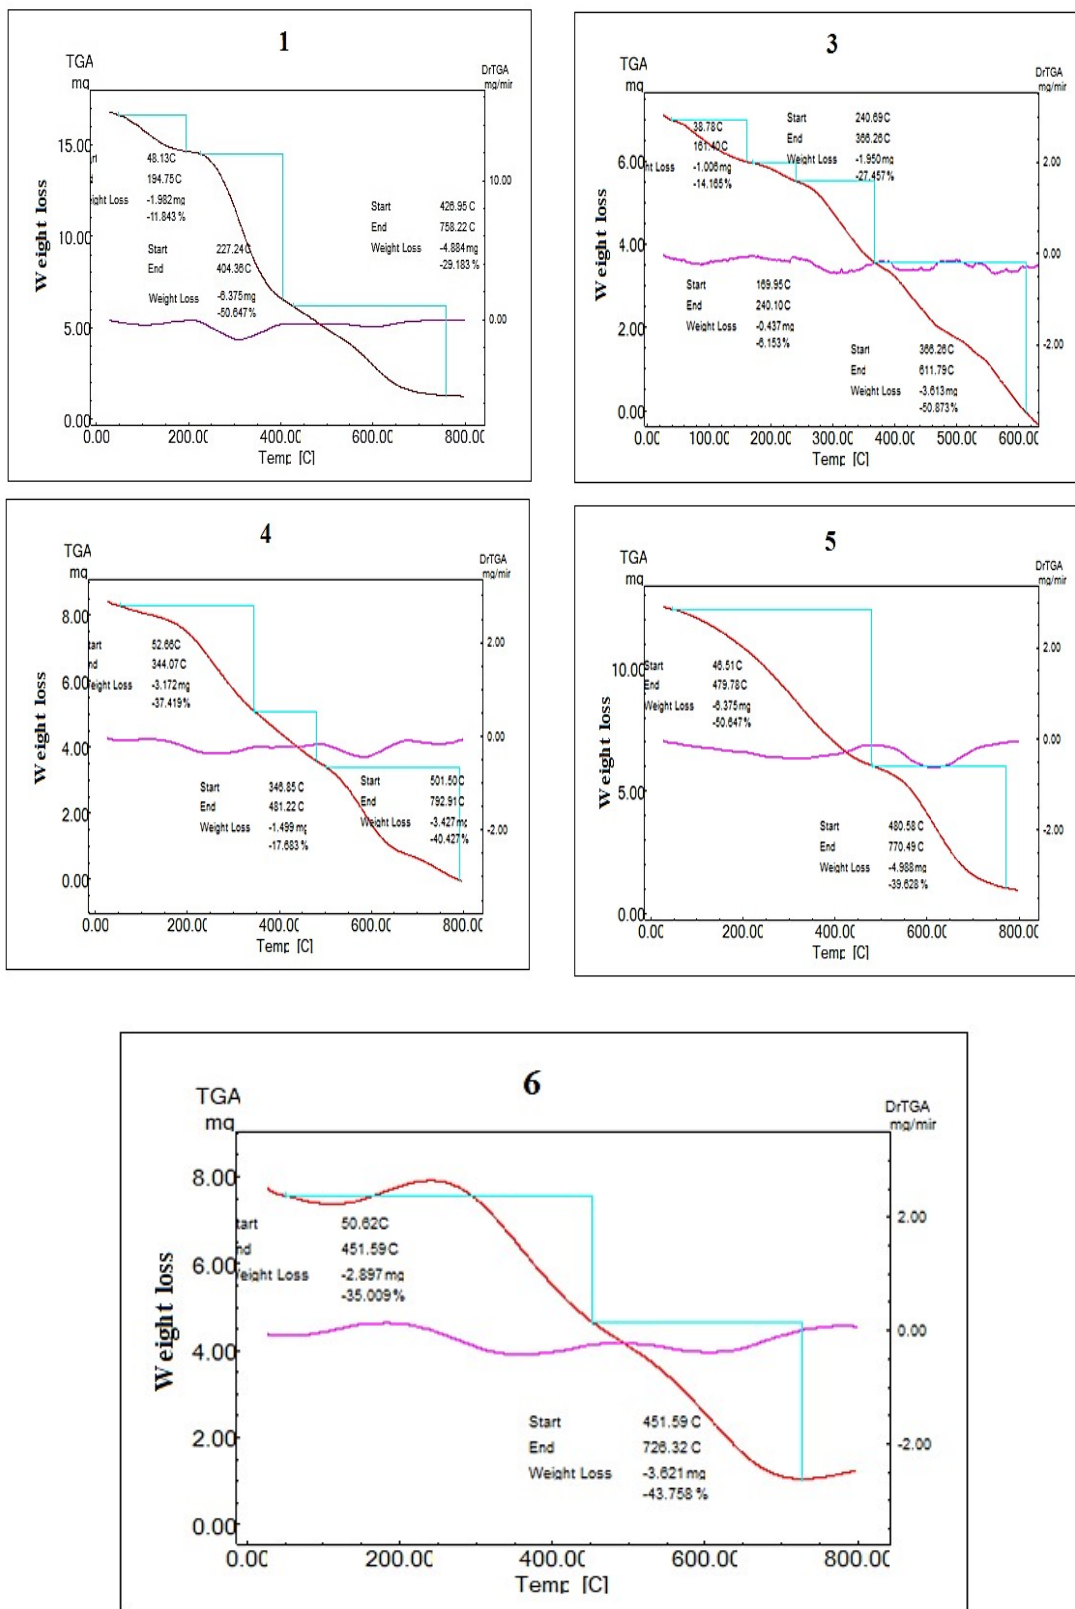

**Figure S3: Thermal stability of the novel photosensitizers.**

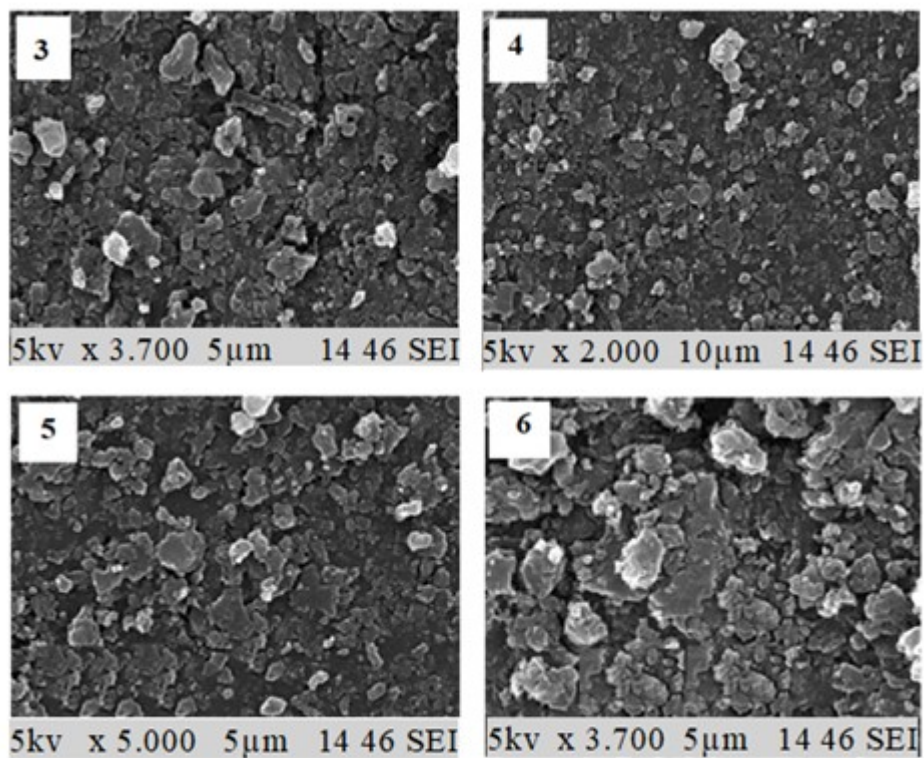

**Figure S4: Porosity of polymethine cyanine dyes 3, 4, 5 and 6.**

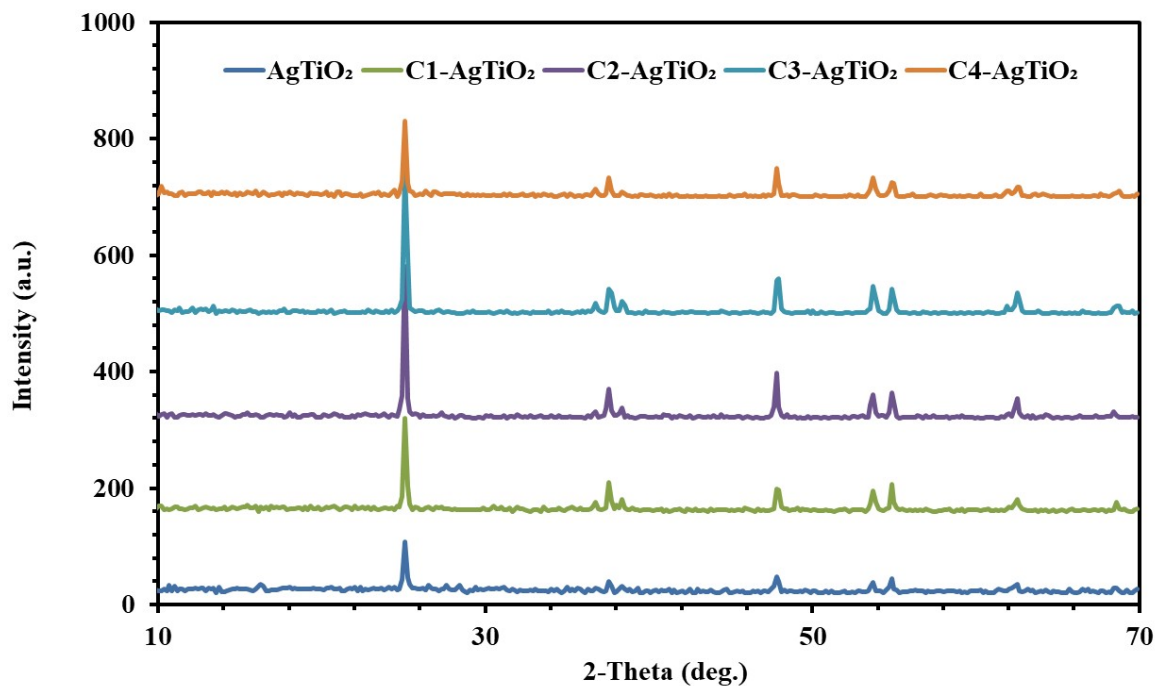

Figure S5: XRD patterns of Ag/TiO<sub>2</sub> and sensitized Ag/TiO<sub>2</sub> samples.

Table S1: The particle size of all the samples before and after sensitization by cyanine obtained from XRD data.

| The sample              | Particle size, nm |
|-------------------------|-------------------|
| Ag/ TiO <sub>2</sub>    | 48.4              |
| C1-Ag/ TiO <sub>2</sub> | 85.6              |
| C2-Ag/ TiO <sub>2</sub> | 94.4              |
| C3-Ag/ TiO <sub>2</sub> | 104.6             |
| C4-Ag/ TiO <sub>2</sub> | 71.1              |

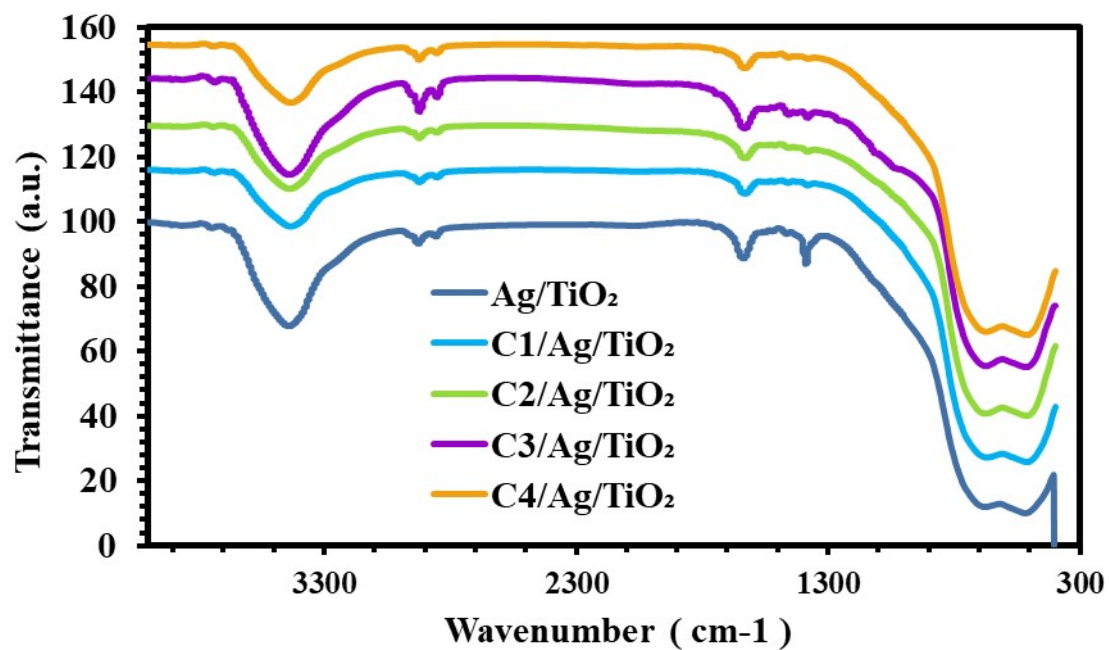

Figure S6: FTIR spectra of Ag/TiO<sub>2</sub> and Cyanine sensitized samples.

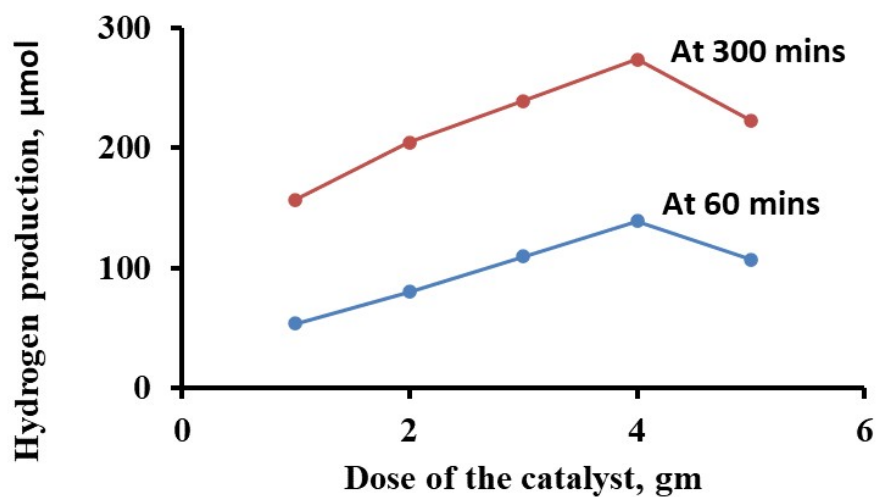

Figure S7: The effect of the dose of the C2/Ag/TiO<sub>2</sub> at 60 mins and 300 mins.

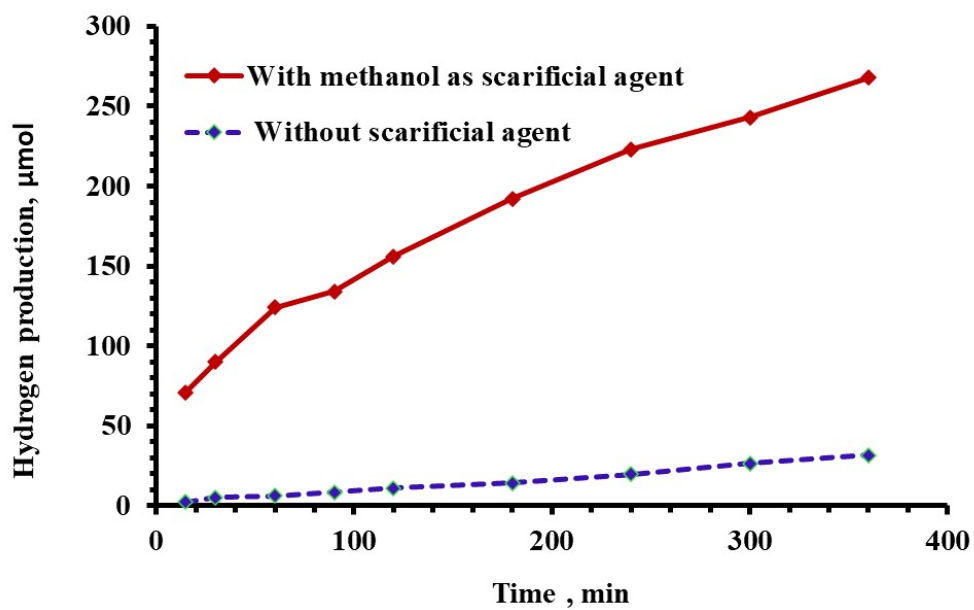

**Figure S8: The effect of methanol as sacrificial molecule on the hydrogen 3 production over C2/Ag/TiO<sub>2</sub>.**
